# Supplementary material for: Association of human leukocyte antigen-DRB1 with anti-cyclic citrullinated peptide autoantibodies in Saudi patients with rheumatoid arthritis
Source: PubMed Central journal article supplement — Ann Saudi Med. 2017 Jan-Feb;37(1):38–41. doi: 10.5144/0256-4947.2017.38 (PMC6148974; doi:10.5144/0256-4947.2017.38), 2017
Supplement: asm-37-1-38-s001.pdf [file asm-37-1-38-s001.pdf]

**Appendix 1.** HLA-DRB1 frequency in rheumatoid arthritis patients and healthy controls. *P*<sub>c</sub> is corrected *P* value for multiple allele testing.

|            | RA patients<br>(n=76) |      | Healthy Controls<br>(n=158) |      | OR   | 95% CI     | <i>P</i> | <i>P</i> <sub>c</sub> |
|------------|-----------------------|------|-----------------------------|------|------|------------|----------|-----------------------|
|            | n                     | %    | n                           | %    |      |            |          |                       |
| DRB1*01:01 | 2                     | 1.3  | 2                           | 0.6  |      |            |          |                       |
| DRB1*01:02 | 2                     | 1.3  | 11                          | 3.5  |      |            |          |                       |
| DRB1*01:20 | 0                     | 0    | 1                           | 0.3  |      |            |          |                       |
| DRB1*03:01 | 13                    | 8.6  | 52                          | 16.5 | 0.47 | 0.23-0.92  | .021     | .82                   |
| DRB1*03:06 | 0                     | 0    | 1                           | 0.3  |      |            |          |                       |
| DRB1*03:38 | 0                     | 0    | 1                           | 0.3  |      |            |          |                       |
| DRB1*04:01 | 7                     | 4.6  | 2                           | 0.6  | 7.58 | 1.41-75.30 | .003     | .12                   |
| DRB1*04:02 | 4                     | 2.6  | 7                           | 2.2  |      |            |          |                       |
| DRB1*04:03 | 9                     | 5.9  | 11                          | 3.5  |      |            |          |                       |
| DRB1*04:04 | 2                     | 1.3  | 1                           | 0.3  |      |            |          |                       |
| DRB1*04:05 | 18                    | 11.8 | 11                          | 3.5  | 3.73 | 1.61-8.96  | .0004    | .016                  |
| DRB1*04:06 | 0                     | 0    | 5                           | 1.6  |      |            |          |                       |
| DRB1*04:07 | 0                     | 0    | 1                           | 0.3  |      |            |          |                       |
| DRB1*04:08 | 1                     | 0.7  | 1                           | 0.3  |      |            |          |                       |
| DRB1*04:20 | 0                     | 0    | 1                           | 0.3  |      |            |          |                       |
| DRB1*07:01 | 21                    | 13.8 | 84                          | 26.6 | 0.44 | 0.25-0.76  | .0019    | .074                  |
| DRB1*08:04 | 1                     | 0.7  | 4                           | 1.3  |      |            |          |                       |
| DRB1*08:06 | 0                     | 0    | 1                           | 0.3  |      |            |          |                       |
| DRB1*09:01 | 1                     | 0.7  | 1                           | 0.3  |      |            |          |                       |
| DRB1*10:01 | 7                     | 4.6  | 14                          | 4.4  |      |            |          |                       |
| DRB1*11:01 | 8                     | 5.3  | 7                           | 2.2  |      |            |          |                       |
| DRB1*11:02 | 0                     | 0    | 1                           | 0.3  |      |            |          |                       |
| DRB1*11:04 | 4                     | 2.6  | 8                           | 2.5  |      |            |          |                       |
| DRB1*12:01 | 2                     | 1.3  | 0                           | 0.0  |      |            |          |                       |
| DRB1*12:02 | 0                     | 0    | 1                           | 0.3  |      |            |          |                       |
| DRB1*13:01 | 5                     | 3.3  | 13                          | 4.1  |      |            |          |                       |
| DRB1*13:02 | 8                     | 5.3  | 12                          | 3.8  |      |            |          |                       |
| DRB1*13:03 | 1                     | 0.7  | 7                           | 2.2  |      |            |          |                       |
| DRB1*13:31 | 0                     | 0    | 1                           | 0.3  |      |            |          |                       |
| DRB1*13:67 | 0                     | 0    | 2                           | 0.6  |      |            |          |                       |
| DRB1*13:83 | 0                     | 0    | 1                           | 0.3  |      |            |          |                       |
| DRB1*14:01 | 1                     | 0.7  | 4                           | 1.3  |      |            |          |                       |
| DRB1*15:01 | 19                    | 12.5 | 20                          | 6.3  | 2.11 | 1.03-4.32  | .024     | .92                   |

Source: Alrogy A, Dirar A, Alrogy W, Fakhoury H, Hajeer A. Association of human leukocyte antigen DRB1 with anti-cyclic citrullinated peptide autoantibodies in Saudi patients with rheumatoid arthritis. *Ann Saudi Med* 2017; 37(1): 38-41.

|            |     |     |    |     |      |             |           |
|------------|-----|-----|----|-----|------|-------------|-----------|
| DRB1*15:02 | 7   | 4.6 | 7  | 2.2 |      |             |           |
| DRB1*15:03 | 2   | 1.3 | 6  | 1.9 |      |             |           |
| DRB1*16:01 | 3   | 2.0 | 10 | 3.2 |      |             |           |
| DRB1*16:02 | 4   | 2.6 | 1  | 0.3 | 8.51 | 0.83-420.50 | .0225 .88 |
| DRB1*16:09 | 0   | 0.0 | 2  | 0.6 |      |             |           |
| DRB1*16:15 | 0.0 | 0.0 | 1  | 0.3 |      |             |           |

RA: rheumatoid arthritis
